# Supplementary material
Source: publisher figshare collection journal article supplement (https://gsapubs.figshare.com/ndownloader/files/39640015)
Supplement: Supplementary file 1 [file 39640015]

## Sheet: Table 5
Table S5 Representative microprobe analyses of plagioclase in eclogite samples
Sample.no	LH3-2		LH3-2			LH3-4			LH3-5			LH3-2
Mineral	An	An	Pl3	Pl3	Pl3	Pl3	Pl3	Pl3	Pl5c	Pl5c	Pl5c	Pl5m	Pl5m	Pl5m	Pl5m	Pl5m
SiO2	43.317	43.816	59.536	61.683	60.323	60.059	57.807	63.528	53.389	51.77	48.08	52.844	52.935	52.9	53.623	54.371
TiO2	-	0.033	-	0.009	0.056	0.083	-	-	0.057	0.046	-	-	0.035	-	0.037	0.035
Al2O3	35.67	35.123	23.536	25.088	26.349	25.663	27.67	24.606	30.457	30.985	34.225	30.959	31.124	31.074	30.575	30.597
Cr2O3	-	-	0.013	0.043	0.017	0.002	0.005	-	0.056	0.03	-	-	-	-	-	-
FeO	0.748	0.693	1.076	0.367	0.433	-	0.012	0.027	0.338	0.36	0.293	0.324	0.377	-	0.143	0.166
MnO	0.026	0.037	0.041	-	0.009	0.022	-	0.002	0.049	0.007	0.012	-	0.01	-	-	0.024
MgO		0.003	1.645	0.159	0.062	0.225	0.011	0.022	-	0.061	0.002	0.006	0.015	-	-	0.006
CaO	19.25	19.143	8.736	6.001	7.21	7.805	9.296	5.204	12.058	13.267	16.038	12.453	12.486	12.527	11.911	12.01
Na2O	0.014	0.021	6.276	7.56	6.504	6.73	5.76	7.261	4.453	2.94	1.944	4.049	3.813	3.861	4.125	3.773
K2O	0.007	0.007	0.009	-	-	0.007	0.003	0.017	0.058	0.04	0.044	-	-	0.022	0.008	0.006
Total	99.032	98.876	100.868	100.91	100.963	100.596	100.564	100.667	100.915	99.506	100.638	100.635	100.795	100.384	100.422	100.988
Oxygens	8	8	8	8	8	8	8	8	8	8	8	8	8	8	8	8
Si	1.90589	1.92784	2.65293	2.70981	2.65412	2.64251	2.54342	2.79514	2.34904	2.2778	2.11545	2.32506	2.32906	2.32752	2.35933	2.39225
Ti	0	0.00109233	0	0.000297451	0.00185364	0.00274736	0	0	0.00188674	0.00152264	0	0	0.00115853	0	0.00122473	0.00115853
Al	1.84968	1.82132	1.23605	1.29896	1.36634	1.33077	1.43484	1.27595	1.57936	1.60674	1.77475	1.60539	1.61395	1.61136	1.58548	1.58662
Cr	0	0	0.000457999	0.00149354	0.000591374	6.95734e-05	0.000173934	0	0.00194806	0.0010436	0	0	0	0	0	0
Fe	0.0275237	0.0254999	0.0400983	0.0134836	0.0159329	0	0.000441557	0.000993504	0.0124372	0.0132467	0.0107814	0.0119221	0.0138723	0	0.00526189	0.00610821
Mn	0.000968941	0.00137888	0.00154745	0	0.000335403	0.000819874	0	7.4534e-05	0.00182608	0.000260869	0.000447204	0	0.00037267	0	0	0.000894408
Mg	0	0.000196774	0.109275	0.0104131	0.00406666	0.0147581	0.000721505	0.00144301	0	0.00400107	0.000131183	0.000393548	0.00098387	0	0	0.000393548
Ca	0.907486	0.902442	0.41709	0.282467	0.339895	0.367944	0.438233	0.245328	0.56844	0.625435	0.756065	0.587061	0.588617	0.590549	0.56151	0.566177
Na	0.0011943	0.00179145	0.542221	0.643935	0.554838	0.574117	0.491369	0.619415	0.379873	0.250803	0.165837	0.345409	0.325276	0.329371	0.351892	0.321864
K	0.000392912	0.000392912	0.000511621	0	0	0.000392912	0.000168391	0.000954216	0.00325556	0.00224521	0.00246973	0	5.61303e-05	0.00123487	0.000449043	0.000336782
Cation Total	4.69313	4.68195	5.00018	4.96163	4.93798	4.93412	4.90937	4.9399	4.89888	4.78339	4.8277	4.87694	4.87335	4.86003	4.86515	4.8758
Or	0.000432212	0.000434337	0.000533037	0	0	0.000416903	0.00018111	0.00110225	0.00342126	0.00255579	0.0026718	0	6.14152e-05	0.00134056	0.000491374	0.000379098
Ab	0.00131376	0.00198032	0.564918	0.695093	0.620116	0.609172	0.528484	0.71551	0.399207	0.285496	0.179405	0.370424	0.355902	0.357563	0.385065	0.362305
An	0.998254	0.997585	0.434549	0.304907	0.379884	0.390411	0.471335	0.283387	0.597372	0.711949	0.817923	0.629576	0.644037	0.641096	0.614444	0.637316
SUM	1	1	1	1	1	1	1	1	1	1	1	1	1	1	1	1
